# Supplementary material for: Structural basis for type VI secreted peptidoglycan dl-endopeptidase function, specificity and neutralization in Serratia marcescens
Source: PubMed Central journal article supplement (PMC3852654; doi:10.1107/s0907444913022725), 2013-11-19
Supplement: d-69-02468-sup1.pdf [file d-69-02468-sup1.pdf]

## Supplementary Material

### Structural basis for Type VI secretion peptidoglycan DL-endopeptidase function, specificity and neutralization in *Serratia marcescens*.

Velupillai Srikannathan, Grant English, Nhat Khai Bui, Katharina Trunk, Patrick E. F. O'Rourke, Vincenzo A. Rao, Waldemar Vollmer, Sarah J. Coulthurst\* and William N. Hunter\*

**Supplementary Table S1. Ssp/Tae4 family proteins and corresponding adjacently-encoded immunity proteins.**

| Organism                                              | Ssp/Tae4 protein           |                    | Adjacent Immunity Protein  |                    |                                |
|-------------------------------------------------------|----------------------------|--------------------|----------------------------|--------------------|--------------------------------|
|                                                       | UNIPROT identifier or name | Genomic identifier | UNIPROT identifier or name | Genomic identifier | Closest Rap                    |
| <i>Agrobacterium tumefaciens</i> C58                  | Q7CUP8_AGRT5               | Atu4347            | A9CGG9_AGRT5               | Atu4346            | Rap1a (SMA2260)                |
| <i>Burkholderia cenocepacia</i> AU1054                | Q1BN86_BURCA               | Bcen_4030          | Q1BN87_BURCA               | Bcen_4029          | Rap1b (SMA2262)                |
| <i>Cronobacter sakazakii</i> ATCC BAA-894             | A7MQ14_CROSS8              | ESA_03935          | A7MQ15_CROSS <sup>1</sup>  | ESA_03936          | Rap1a (SMA2260)                |
| <i>Enterobacter cloacae</i> ATCC 13047                | D5C6F6_ENTCC               | ECL_01542          | D5C6F7_ENTCC               | ECL_01543          | Rap2b (SMA2266)                |
| <i>Enterobacter hormaechei</i> ATCC 49162             | F5RYK9_9ENTR               |                    | F5RYK8_9ENTR               |                    | Rap2b (SMA2266)                |
| <i>Erwinia amylovora</i> CFBP1430                     | D4I0Q7_ERWAC               | EAMY_3018          | D4I0Q6_ERWAC               | EAMY_3017          | Rap2a (SMA2265)                |
| <i>Erwinia tasmaniensis</i> Et1/99                    | B2VH84_ERWT9               | ETA_06210          | B2VJE3_ERWT9               | ETA_06220          | Rap2a (SMA2265)                |
| <i>Escherichia coli</i> B354                          | D6J6Z7_ECOLX               | ECEG_03250         | D6J6Z8_ECOLX               | ECEG_03251         | Rap2a (SMA2265)                |
| <i>Pantoea</i> sp. Sc1                                | H8DNR2_9ENTR               | S7A_11480          | H8DNR1_9ENTR               | S7A_11475          | Rap2b (SMA2266)                |
| <i>Pseudomonas syringae</i> pv. <i>syringae</i> B728a | Q4ZP52_PSEU2               | Psyr_4040          | Q4ZP51_PSEU2               | Psyr_4041          | Rap1b (SMA2262)                |
| <i>Salmonella Newport</i> SL254                       | B4SV53_SALNS               | SNSL254_A0303      | B4SV54_SALN                | SNSL254_A0304      | Rap2a (SMA2265)                |
| <i>Salmonella</i> Typhi CT18                          | Q8Z963_SALTI               | STY0307            | Q8Z964_SALTI               | STY0306            | Rap1a <sup>2</sup> (SMA2260)   |
| <i>Salmonella</i> Typhimurium LT2                     | Q93IS4_SALTY               | STM0277            | Q8ZRL5_SALTY               | STM0278            | Rap2a (SMA2265)                |
| <i>Serratia odorifera</i> DSM 4582                    | D4E4R6_SEROD               |                    | D4E4R5_SEROD               |                    | Rap1b (SMA2262)                |
| <i>Acinetobacter baumannii</i> SDF                    | B0VVE3_ACIBS               | p2ABSDF0033        | B0VVE4_ACIBS               | p2ABSDF0034        | (Rap2a) <sup>3</sup> (SMA2265) |
| <i>Serratia marcescens</i> Db10                       | Ssp1                       | SMA2261            | Rap1a                      | SMA2260            |                                |
| <i>Serratia marcescens</i> Db10                       | Ssp2                       | SMA2264            | Rap2a                      | SMA2265            |                                |

<sup>1</sup> Note that this is not the same protein as the one identified as a Tai4 protein in this organism by Russell *et al.*, 2012; that protein, ESA\_03932, is an orphan Tai4 protein of the Rap2b type not immediately adjacent to Tae4

<sup>2</sup> STY0306 (SciQ) is approximately twice the size of other Rap proteins, resembling a fusion of two adjacent Rap1a proteins

<sup>3</sup> p2ABSDF0034 shows only very weak sequence similarity with Rap2a

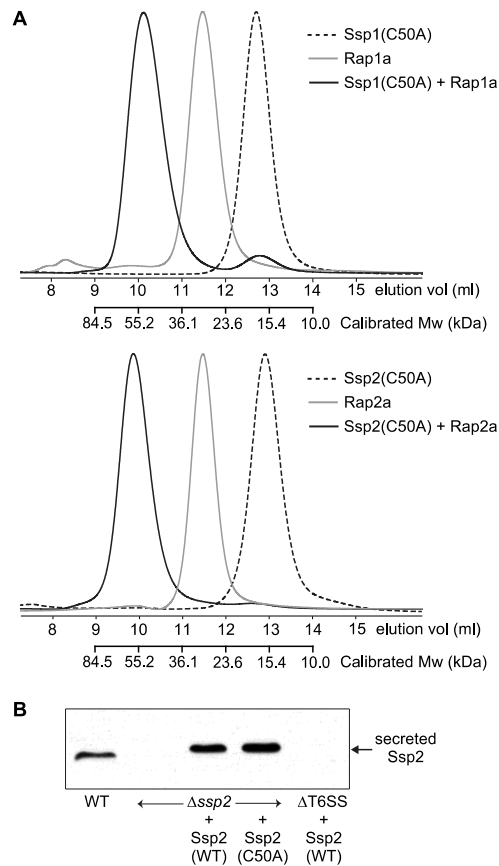

**Supplementary Figure S1. Immunity protein binding and secretion is not impaired in Ssp1 and Ssp2 C50A mutants.** (A) Size exclusion chromatography analysis of complex formation between Ssp1 (C50A) and Rap1a, top, or Ssp2 (C50A) and Rap2a, bottom. 10 nmol of the protein indicated, or of each protein in the case of the mixtures, was separated on a calibrated Superdex 75 10/300 GL column. (B) Immunoblot detection of Ssp2 in the secreted fraction of the strains indicated: wild type *S. marcescens* Db10 [WT]; mutant lacking Ssp2 [ $\Delta ssp2$ ];  $\Delta ssp2$  mutant carrying plasmids expressing wild type Ssp2 [+Ssp2(WT); pSC541] or the C50A mutant of Ssp2 [+Ssp2(C50A); pSC1230]; and a Type VI secretion system mutant [ $\Delta T6SS$ ] expressing wild type Ssp2.

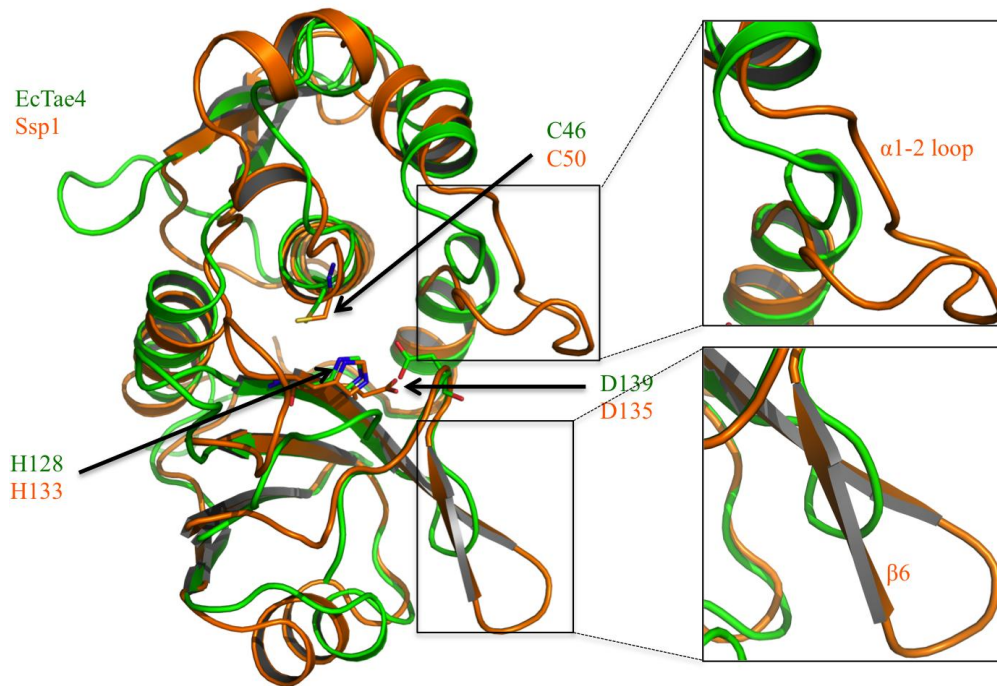

**Supplementary Figure S2. Superimposition of Ssp1 (orange ribbon) and *EcTae4* (green ribbon).** The catalytic triads (histidine, cysteine and aspartate) are shown as sticks and divergent regions are shown in the boxes.

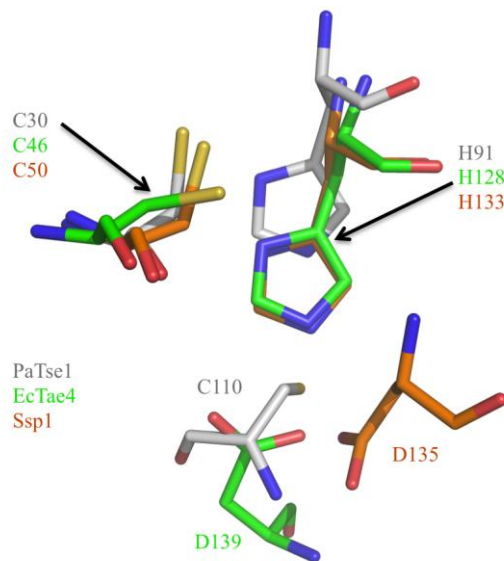

**Supplementary Figure S3. Superimposition of the catalytic residues of Ssp1, *PaTse1* and *EcTae4*.** The color code is N blue, O red, S yellow then C positions for Ssp1 orange, *PaTse1* grey and *EcTae4* green.

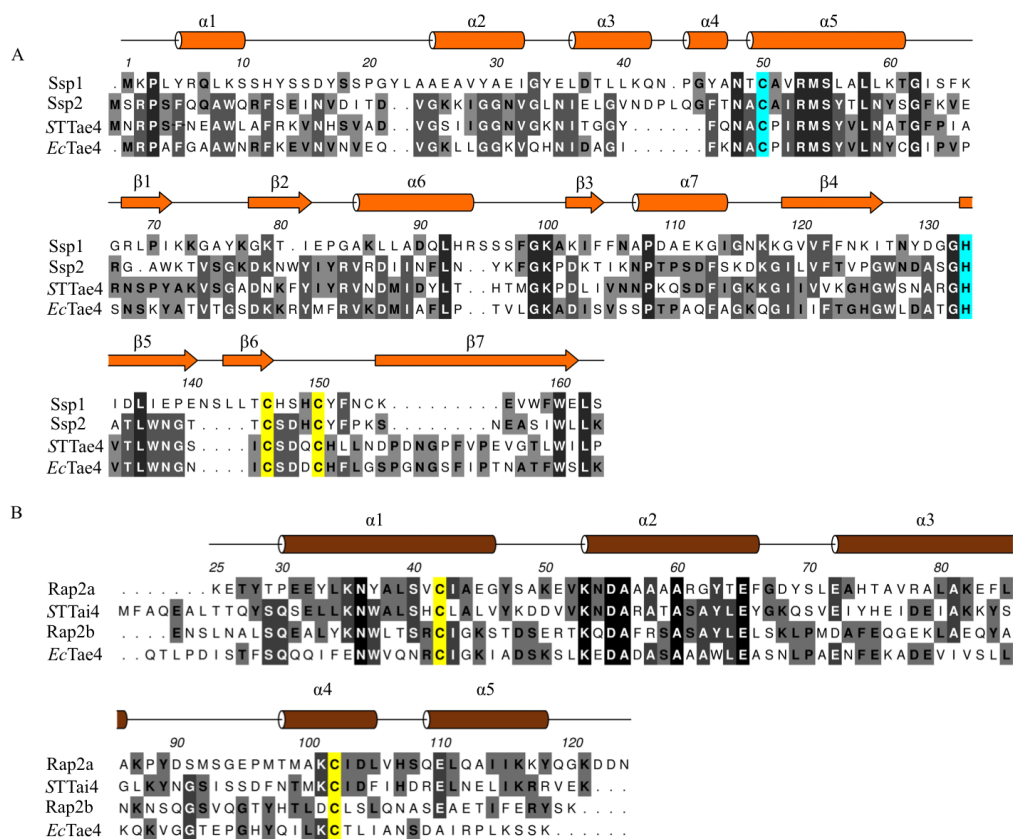

**Supplementary Figure S4. Sequence alignment of Ssp1 and selected homologues.** A. Structure-based sequence alignment highlights the conserved secondary-structure content (orange cylinders and sheets) in this group of four endopeptidase effectors. Residues involved in disulfide bond formation are coloured yellow. The catalytic histidine and cysteine residues are marked in cyan. The alignment was generated using ClustalW and the figure was prepared using *ALINE* (Bond & Schüttelkopf, 2009). B. An alignment of *S. marcescens* Rap2a with Tai4 from *E. cloacae* and *S. Typhimurium*. Sequence numbering and secondary structure has been drawn based on the Rap2a crystal structure (without signal peptide - brown). Strictly conserved residues in all four sequences are encased in black, conserved in two or three in shades of grey with the conserved cysteines involved in disulfide bond formation highlighted in yellow.

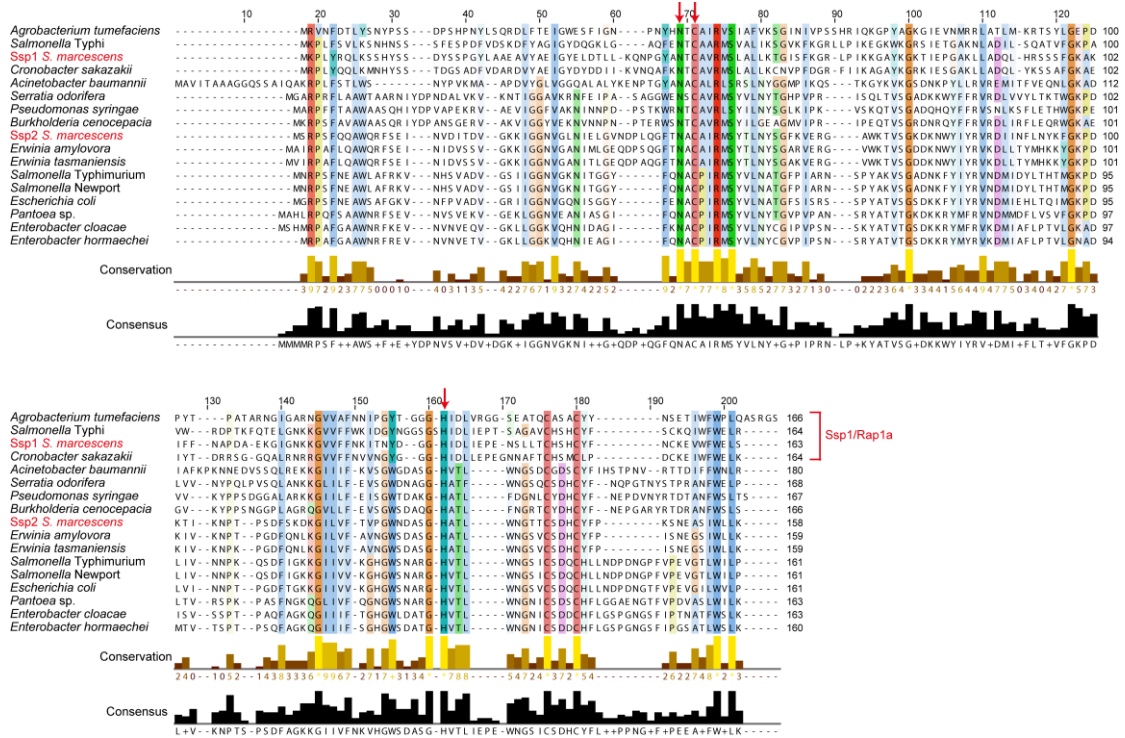

**Supplementary Figure S5. Multiple sequence alignment of Ssp1 and Ssp2 with other Tae4 proteins.** Alignment was generated using MUSCLE (Edgar, 2004) and visualised using Jalview (Waterhouse *et al.*, 2009). Red arrows show the amino acid residues forming the catalytic triad. The Ssp1-like proteins associated with Rap1a-type immunity proteins are also indicated. The Tae4 homologues are labelled by organism and their identities are as follows (UNIPROT identifier, genomic identifier): *Acinetobacter baumannii* (B0VVE3\_ACIBS, p2ABSDF0033), *Agrobacterium tumefaciens* (Q7CUP8\_AGRT5, Atu4347), *Burkholderia cenocepacia* (Q1BN86\_BURCA, Bcen\_4030), *Cronobacter sakazakii* (A7MQ14\_CROS8, ESA\_03935), *Enterobacter cloacae* (D5C6F6\_ENTCC, ECL\_01542), *Enterobacter hormaechei* (F5RYK9\_9ENTR), *Erwinia amylovora* (D4I0Q7\_ERWAC, EAMY\_3018), *Erwinia tasmaniensis* (B2VH84\_ERWT9, ETA\_06210), *Escherichia coli* (D6J6Z7\_ECOLX, ECEG\_03250), *Pantoea* sp. (H8DNR2\_9ENTR, S7A\_11480), *Pseudomonas syringae* (Q4ZP52\_PSEU2, Psyr\_4040), *Salmonella enterica* serovar Newport (B4SV53\_SALNS, SNSL254\_A0303), *Salmonella enterica* serovar Typhimurium (Q93IS4\_SALTY, STM0277) *Salmonella enterica* serovar Typhi (Q8Z963\_SALTI, STY0307), *Serratia odorifera* (D4E4R6\_SEROD). See also Supplementary Table S1.

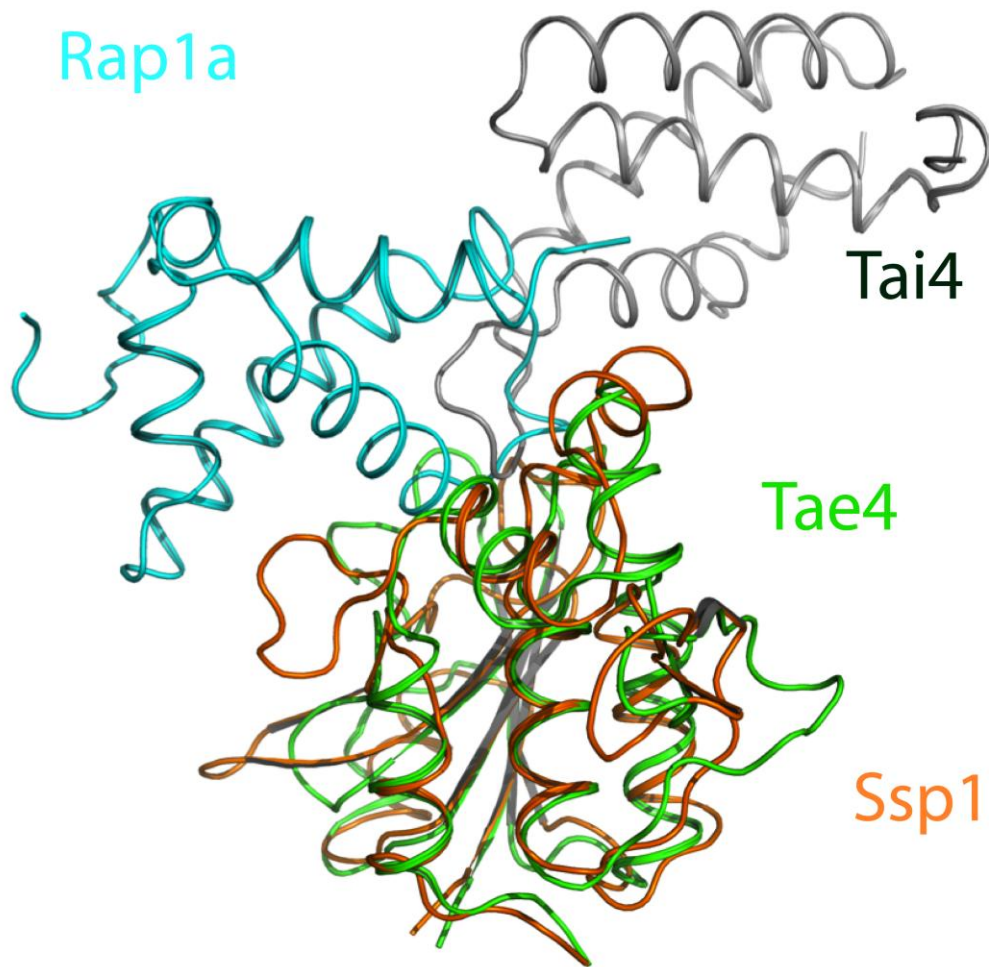

**Supplementary Figure S6. Distinct placement of the immunity proteins inhibits different peptidoglycan endopeptidases.** Four polypeptides are shown in ribbon style; Ssp1 is colored orange, *EcTae4* is green, one subunit of *EcTai4* is grey and one subunit of Rap1a is cyan. A least-squares overly of Ssp1 and Tae4 was carried out and this then highlights the different positions that the immunity proteins occupy when they bind and inhibit their cognate effector.
